# Supplementary material
Source: publisher site journal article supplement (https://www.e-cmh.org/upload/media/cmh-2022-0205-Supplementary-Fig-5.pdf)
Supplement: Supplementary file 1 [file cmh-2022-0205-Supplementary-Fig-5.pdf]

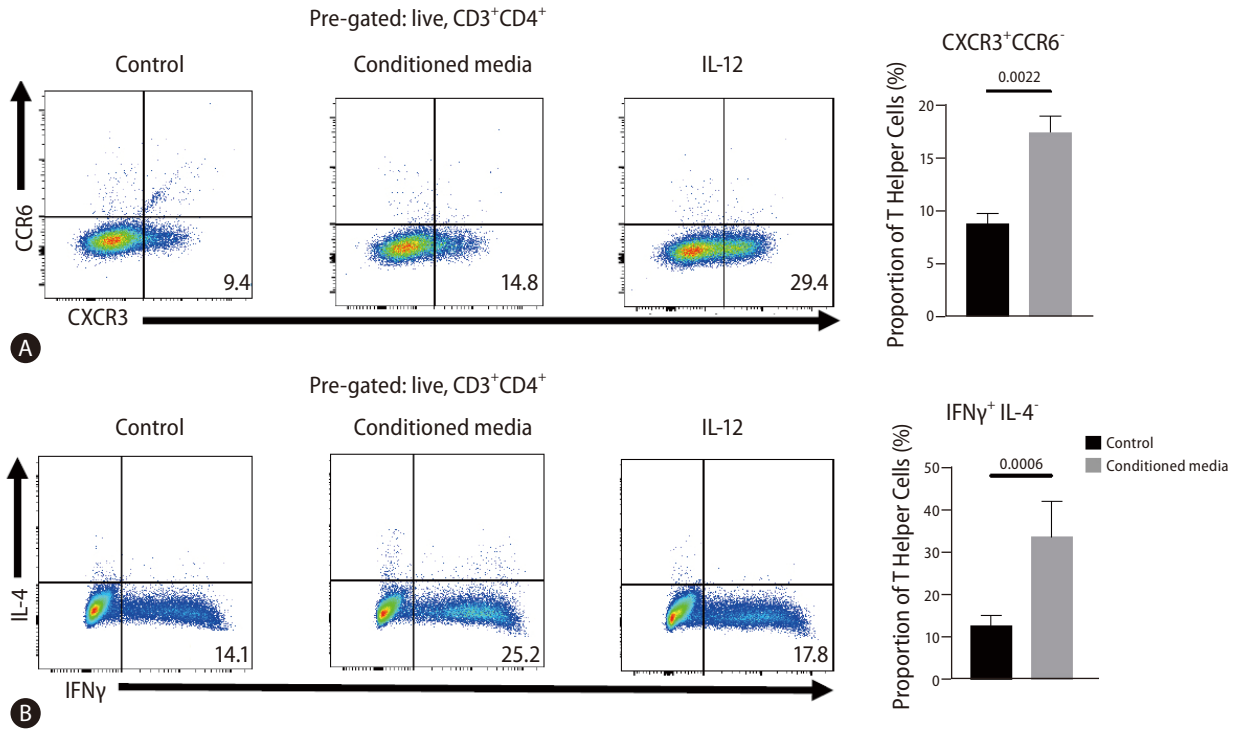

**Supplementary Figure 5.** Naïve T cells isolated from healthy controls were incubated in media supplemented with supernatant from the fatty-acid treated HepG2 cells, resulting in increased Th1 cell skew. (A) Representative gating strategy to identify the proportion of CXCR3<sup>+</sup>CCR6<sup>-</sup> T helper cells, pre-gated on live, singlet CD3<sup>+</sup>CD4<sup>+</sup> leukocytes. (B) Representative gating strategy to identify the proportion of IFN $\gamma$ <sup>+</sup>IL4<sup>-</sup> T helper cells, pre-gated on live, singlet CD3<sup>+</sup>CD4<sup>+</sup> leukocytes. P values were determined by Man-Whitney U test (experiments n=3).
